# Supplementary material for: A novel replication initiation region encoded in a widespread Acinetobacter plasmid lineage carrying a blaNDM-1 gene
Source: PubMed Central journal article supplement (PMC11142715; doi:10.1371/journal.pone.0303976), 2024-05-31

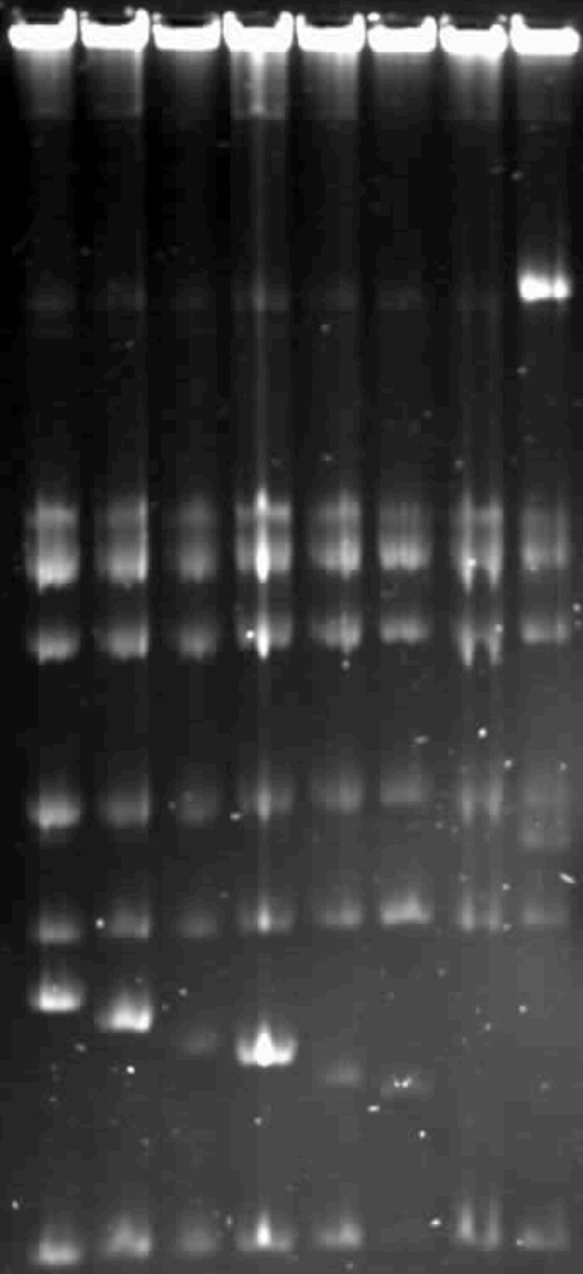

Supplement: pone.0303976.s002.pdf [file pone.0303976.s002.pdf]
