# Supplementary material for: A novel replication initiation region encoded in a widespread Acinetobacter plasmid lineage carrying a blaNDM-1 gene
Source: PubMed Central journal article supplement (PMC11142715; doi:10.1371/journal.pone.0303976), 2024-05-31
Supplement: pone.0303976.s003.pdf [file pone.0303976.s003.pdf]

| Name           | Sequence                                                   | Restriction site |
|----------------|------------------------------------------------------------|------------------|
| pAhaeAN54e_1F  | <b>CTCGAG</b> CCTAAAGGGGGTGTAAACGAAGTGTC                   | XhoI             |
| pAhaeAN54e_2R  | <b>CTCGAG</b> ATTATTCATAAAACCGCCCTCATTTAATATTTAGGT         | XhoI             |
| pAhaeAN54e_3F  | <b>CTCGAG</b> ACCTAAATATTAAATGAGGGCGGTTTTATGAATAAT         | XhoI             |
| pAhaeAN54e_4R  | <b>CTCGAG</b> GCTTAGTACGCTTAAAAATAATTTCTTC                 | XhoI             |
| pAhaeAN54e_5F  | AGTC <b>CTCGAG</b> AGTCTAAGTTTCTTTAATGATGATTTTG            | XhoI             |
| pAhaeAN54e_6R  | <b>CTCGAG</b> GATCTGCAGGCTTAGATACTGAAATCTGAAGTGAG          | XhoI             |
| pAhaeAN54e_7F  | <b>CTCGAG</b> TATGTATGTTCTATCAGGAAGATTGTAGCG               | XhoI             |
| pAhaeAN54e_8R  | <b>CTCGAG</b> GTTCAGATGGTATGAATCAATTGCTAG                  | XhoI             |
| F5Xho-Up       | GATA <b>CTCGAG</b> ATCATGTTTCATTGATTGGGCTTAGATAAGG         | XhoI             |
| F5Pst-Low      | GAT <b>CTGCAG</b> GCATTCAAAGTCTGGCTCAATTAATC               | PstI             |
| pAhaeAN54e_11F | <b>CTCGAG</b> TTTCAGATACGAACGTAAATTACCCATAACC              | XhoI             |
| pAhaeAN54e_12R | <b>CTCGAG</b> GTTGCAACTTTATTATTCAAGAGGTGGACA               | XhoI             |
| pAhaeAN54e_13F | <b>CTCGAG</b> TATCACACCCTGAATTTCTACAGCC                    | XhoI             |
| pAhaeAN54e_14R | <b>CTCGAG</b> TTGTACTCACAAAACAATCAAGGGG                    | XhoI             |
| pAhaeAN54e_15F | <b>CTCGAG</b> TAGCCTTATCGGTTATAGAGTTATAACAG                | XhoI             |
| pAhaeAN54e_16R | <b>CTCGAG</b> TCAGTGTTATTGCTCATGTTCTTTTCC                  | XhoI             |
| F9Xho-Up       | ATA <b>CTCGAG</b> CAATCAATGAAATTAAGGGCTATCGTG              | XhoI             |
| F9PstI-Low     | GAT <b>CTGCAG</b> GGACTTTCAAGATAGGCTCTTGAG                 | PstI             |
| F10Xho-Up      | GATA <b>CTCGAG</b> GATTTAAGTGGGTTATGAGTGCGG                | XhoI             |
| F10PstI-Low    | GAT <b>CTGCAG</b> GATTGCATCATTGTTATTTTGGTCG                | PstI             |
| pAhaeAN54e_21F | <b>CTCGAG</b> AGCGTATTGCAGAATTGCAAACAC                     | XhoI             |
| pAhaeAN54e_22R | <b>CTCGAG</b> TACCCAACGAAACAGCAAATTAG                      | XhoI             |
| F8-B-up        | CAG <b>CTCGAG</b> GTAAGCTTTGAGCAATCAAC                     | XhoI             |
| F8-C-Low2      | CAG <b>GAGCTC</b> TCAGTGTTATTGCTCATGTTT                    | SacI             |
| BCc-1-Up       | CAG <b>GGTACC</b> CTATGATATTTCAATAAATAGC                   | KpnI             |
| BCc-1.2-Up     | CAG <b>GGTACC</b> CTATATTCTTCGGTACACAGT                    | KpnI             |
| B-Low-215      | CAG <b>GAGCTC</b> TTGTTATTTAAAGTCTTTATAAGT                 | SacI             |
| B-Low-107      | CAG <b>GAGCTC</b> CTTAGTCGTTTTCGCTTC                       | SacI             |
| B-Low-70       | CAG <b>GAGCTC</b> TTGGTGAGATTGAGCAGA                       | SacI             |
| F8-AB-Low      | CAG <b>GAGCTC</b> ATATTAATTTGTACTCACAAAACA                 | SacI             |
| FShR1-up       | CTAAGCAAAAAAAAAATTGCTTAA <b>AGCTT</b> CTATCTTGAATATTGCCG   | HindIII          |
| FShR1-low      | CGGCAATATTCAAGATAG <b>AAGCTT</b> AAGCAATTTTTTTTGCTTAG      | HindIII          |
| FShR2-Up       | CTTATTTATGCCAGTTCCTAGCG <b>AAGCTT</b> CTGCGTCCCCGCCTATTGTG | HindIII          |
| FShR2-Low      | ACAATAGGCGGGGACGCAG <b>AAGCTT</b> CGCTAGGAACTGGCATAAATAAG  | HindIII          |
| FSh-R3-up      | CAAACCTTATGATCTTCGTT <b>AAGCTT</b> TGTTTACCGCATCAAATAAC    | HindIII          |
| FSh-R3-Low     | GTTATTTGATGCGGTAAACA <b>AAGCTT</b> AACGAAGATCATAAGGTTTG    | HindIII          |

**S1 Table.**
