# Supplementary material for: A novel replication initiation region encoded in a widespread Acinetobacter plasmid lineage carrying a blaNDM-1 gene
Source: PubMed Central journal article supplement (PMC11142715; doi:10.1371/journal.pone.0303976), 2024-05-31
Supplement: pone.0303976.s004.pdf [file pone.0303976.s004.pdf]

S2 Table 2

| Description                                                                         | Scientific Name                | Max Score | Total Score | Query Cover | E value | Per. ident | Accession  | Lenght     | NDM     |
|-------------------------------------------------------------------------------------|--------------------------------|-----------|-------------|-------------|---------|------------|------------|------------|---------|
| Acinetobacter lwoffii SU1904 plasmid pSU1904NDM DNA, complete sequence              | Acinetobacter lwoffii          | 1541      | 1541        | 100%        | 0       | 100        | LC537594.1 | 43651 bp   | P       |
| Acinetobacter baumannii strain AB17 plasmid pAB17, complete sequence                | Acinetobacter baumannii        | 1541      | 1541        | 100%        | 0       | 100        | MT002974.1 | 41087 bp   | P       |
| Acinetobacter indicus strain TQ18 plasmid p18TQ-NDM, complete sequence              | Acinetobacter indicus          | 1541      | 1541        | 100%        | 0       | 100        | CP045133.1 | 40439 bp   | P       |
| Acinetobacter indicus strain TQ23 plasmid p23TQ-NDM, complete sequence              | Acinetobacter indicus          | 1541      | 1541        | 100%        | 0       | 100        | CP045197.1 | 41393 pb   | P       |
| Acinetobacter indicus strain TQ04 plasmid p4TQ-NDM, complete sequence               | Acinetobacter indicus          | 1541      | 1541        | 100%        | 0       | 100        | CP045130.1 | 41086 pb   | P       |
| Acinetobacter pittii SU1805 plasmid pSU1805NDM DNA, complete sequence               | Acinetobacter pittii           | 1541      | 1541        | 100%        | 0       | 100        | LC483156.1 | 41022 bp   | P       |
| Acinetobacter haemolyticus strain AN54 plasmid pAhaeAN54e, complete sequence        | Acinetobacter haemolyticus     | 1541      | 1541        | 100%        | 0       | 100        | CP041229.1 | 45460 bp   | P       |
| Acinetobacter cumulans strain WCHAc060092 plasmid pNDM1_060092, complete sequence   | Acinetobacter cumulans         | 1541      | 1541        | 100%        | 0       | 100        | CP035935.1 | 48560 bp   | P       |
| <b>Escherichia coli strain WPB121 chromosome</b>                                    | Escherichia coli               | 1541      | 1541        | 100%        | 0       | 100        | CP034426.1 | 4637028 bp | ND      |
| <b>Acinetobacter baumannii strain WPB103 chromosome</b>                             | Acinetobacter baumannii        | 1541      | 1541        | 100%        | 0       | 100        | CP034427.1 | 3240866 bp | ND      |
| Acinetobacter sp. WCHAc010034 plasmid pNDM1_010034, complete sequence               | Acinetobacter sp. WCHAc010034  | 1541      | 1541        | 100%        | 0       | 100        | CP032278.1 | 49649 bp   | P       |
| Acinetobacter chinensis strain WCHAc010005 plasmid pNDM1_010005, complete sequence  | Acinetobacter chinensis        | 1541      | 1541        | 100%        | 0       | 100        | CP032132.1 | 39357 bp   | P       |
| Acinetobacter nosocomialis strain IEC38057 plasmid pIEC38057, complete sequence     | Acinetobacter nosocomialis     | 1541      | 1541        | 100%        | 0       | 100        | MK053934.1 | 41085 bp   | P       |
| Acinetobacter baumannii strain IEC383 plasmid pIEC383                               | Acinetobacter baumannii        | 1541      | 1541        | 100%        | 0       | 100        | MK053932.1 | 47283 bp   | P       |
| Acinetobacter baumannii strain AR_0088 plasmid unnamed2, complete sequence          | Acinetobacter baumannii        | 1541      | 1541        | 100%        | 0       | 100        | CP027532.1 | 41087 bp   | P       |
| Acinetobacter sp. ACNIH1 plasmid pNDM-9c17, complete sequence                       | Acinetobacter sp. ACNIH1       | 1541      | 1541        | 100%        | 0       | 100        | CP026425.1 | 39361 bp   | P       |
| Acinetobacter baumannii strain ABNIH28 plasmid pNDM-0285, complete sequence         | Acinetobacter baumannii        | 1541      | 1541        | 100%        | 0       | 100        | CP026127.1 | 39359 bp   | P       |
| Providencia rettgeri strain 06-1619 plasmid p06-1619-NDM, complete sequence         | Providencia rettgeri           | 1541      | 1541        | 100%        | 0       | 100        | KX832928.1 | 54712 bp   | P       |
| Acinetobacter sp. SU8482 plasmid pSU8482NDM DNA, complete sequence                  | Acinetobacter sp.              | 1541      | 1541        | 100%        | 0       | 100        | LC771431.1 | 42372 bp   | P       |
| Acinetobacter johnsonii SU8379 plasmid pSU8379NDM DNA, complete sequence            | Acinetobacter johnsonii        | 1541      | 1541        | 100%        | 0       | 100        | LC771430.1 | 51560 bp   | P       |
| Acinetobacter bereziniae strain UCO-554 plasmid unnamed1, complete sequence         | Acinetobacter bereziniae       | 1541      | 1541        | 100%        | 0       | 100        | CP123919.1 | 47274 bp   | NA      |
| Acinetobacter bereziniae strain UCO-553 plasmid unnamed1, complete sequence         | Acinetobacter bereziniae       | 1541      | 1541        | 100%        | 0       | 100        | CP123913.1 | 38106 bp   | NA      |
| Acinetobacter dijkschoorniae strain JVAP01 plasmid pNDM-JVAP01, complete sequence   | Acinetobacter lactucae         | 1541      | 1541        | 100%        | 0       | 100        | KM923969.1 | 47268 bp   | P       |
| Acinetobacter sp. JN247 plasmid pNDM-JN02, complete sequence                        | Acinetobacter sp. JN247        | 1541      | 1541        | 100%        | 0       | 100        | KM210088.1 | 41084 bp   | P       |
| Acinetobacter lwoffii strain JN49-1 plasmid pNDM-JN01, complete sequence            | Acinetobacter lwoffii          | 1541      | 1541        | 100%        | 0       | 100        | KM210086.1 | 41084 bp   | P       |
| Acinetobacter nosocomialis strain 6411 plasmid p6411-9.012kb, complete sequence     | Acinetobacter nosocomialis     | 1541      | 1541        | 100%        | 0       | 100        | CP010370.2 | 47274 bp   | P       |
| Acinetobacter baumannii strain 6200 plasmid p6200-47.274kb, complete sequence       | Acinetobacter baumannii        | 1541      | 1541        | 100%        | 0       | 100        | CP010399.1 | 47274 bp   | A       |
| Acinetobacter baumannii strain OC061 plasmid p1OC061, complete sequence             | Acinetobacter baumannii        | 1541      | 1541        | 100%        | 0       | 100        | CP087301.1 | 47260 bp   | A (GIM) |
| Acinetobacter pittii strain Acinetobacter pittii plasmid pNDM-AP, complete sequence | Acinetobacter pittii           | 1541      | 1541        | 100%        | 0       | 100        | KJ003839.1 | 39364 bp   | P       |
| Acinetobacter lwoffii strain lz4b plasmid pNDM-lz4b, complete sequence              | Acinetobacter lwoffii          | 1541      | 1541        | 100%        | 0       | 100        | KJ547696.1 | 46570 bp   | P       |
| Acinetobacter sp. M131 plasmid pM131_NDM1, complete sequence                        | Acinetobacter sp. M131         | 1541      | 1541        | 100%        | 0       | 100        | JX072963.1 | 47271 bp   | P       |
| Acinetobacter bereziniae strain CHI-40-1 plasmid pNDM-40-1, complete sequence       | Acinetobacter bereziniae       | 1541      | 1541        | 100%        | 0       | 100        | KF702385.1 | 45826 bp   | P       |
| Acinetobacter johnsonii strain MR1 plasmid pMRB, complete sequence                  | Acinetobacter johnsonii        | 1541      | 1541        | 100%        | 0       | 100        | CP079750.1 | 41087 bp   | P       |
| Acinetobacter baumannii ZW85-1 plasmid pAbNDM-1, complete sequence                  | Acinetobacter baumannii ZW85-1 | 1541      | 1541        | 100%        | 0       | 100        | JN377410.2 | 48368 bp   | P       |
| Acinetobacter sp. strain FL51 plasmid pNDM-FL51, complete sequence                  | Acinetobacter sp.              | 1541      | 1541        | 100%        | 0       | 100        | MW073138.1 | 41068 bp   | P       |
| Acinetobacter baumannii strain GF216 plasmid pNDM-AB, complete sequence             | Acinetobacter baumannii        | 1541      | 1541        | 100%        | 0       | 100        | KC503911.1 | 47098 bp   | P       |
| Acinetobacter lwoffii strain WJ10659 plasmid pNDM-BJ02, complete sequence           | Acinetobacter lwoffii          | 1541      | 1541        | 100%        | 0       | 100        | JQ060896.1 | 46165 bp   | P       |
| Acinetobacter lwoffii strain WJ10621 plasmid pNDM-BJ01, complete sequence           | Acinetobacter lwoffii          | 1541      | 1541        | 100%        | 0       | 100        | JQ001791.1 | 47274 bp   | P       |
| Acinetobacter baumannii OCU_Ac16a plasmid pOCU_Ac16a_2 DNA, complete sequence       | Acinetobacter baumannii        | 1541      | 1541        | 100%        | 0       | 100        | AP023079.1 | 41087 bp   | P       |
| Acinetobacter sp. WCHAc010052 plasmid pNDM1_010052, complete sequence               | Acinetobacter sp. WCHAc010052  | 1131      | 1542        | 100%        | 0       | 100        | CP032142.1 | 39365 bp   | P       |
